# Supplementary material for: Shape effects of cuprous oxide particles on stability in water and photocatalytic water splitting
Source: Royal Society of Chemistry journal article supplement (doi:10.1039/c4ta04863f), 2014-11-11
Supplement: c4ta04863f1.pdf [file c4ta04863f1.pdf]

**Supporting Information**

**Shape Effect of Cuprous Oxide Particles on Stability in Water and  
Photocatalytic Water Splitting**

Yongwoo Kwon<sup>a, b</sup>, Aloysius Soon<sup>c</sup>, Haksoo Han<sup>a</sup> and Hyunjoo Lee<sup>b\*</sup>

<sup>a</sup>Department of Chemical and Biomolecular Engineering, Yonsei University, Seoul 120-749, Republic of Korea, <sup>b</sup>Department of Chemical and Biomolecular Engineering, Korea Advanced Institute of Science and Technology, Daejeon 305-701, Republic of Korea, <sup>c</sup>Department of Material Science and Engineering, Yonsei University, Seoul 120-749, Republic of Korea

**Figure S1-S6;**

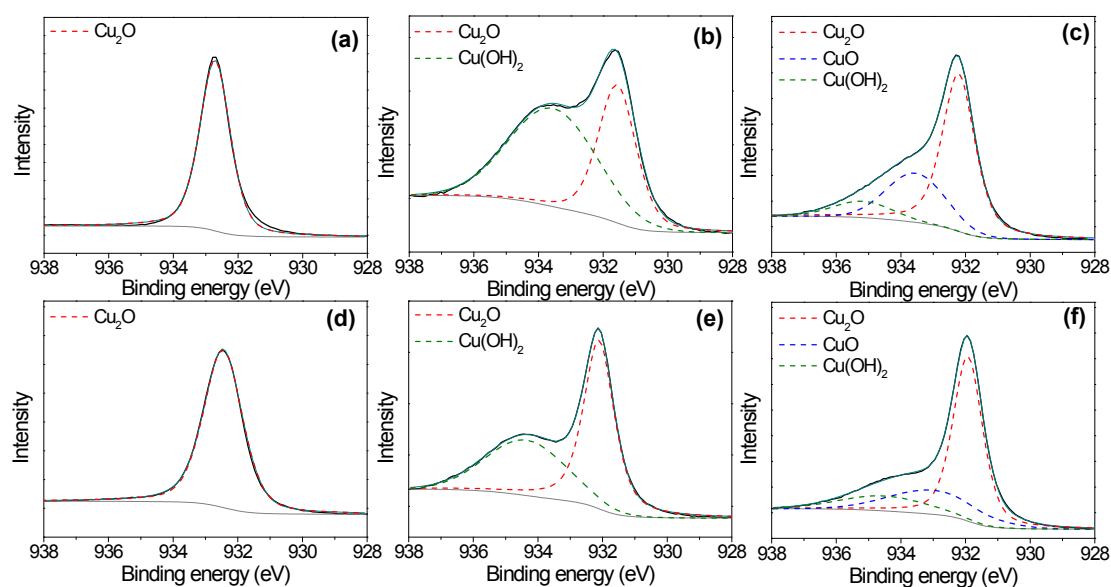

**Figure S1.** XPS Cu 2p<sub>3/2</sub> peaks of (a)~(c) cubic and (d)~(f) octahedral Cu<sub>2</sub>O. (a), (d) as-made Cu<sub>2</sub>O crystals; (b), (e) after three weeks in deionized water; (c), (f) after 9 hrs in photo-irradiation

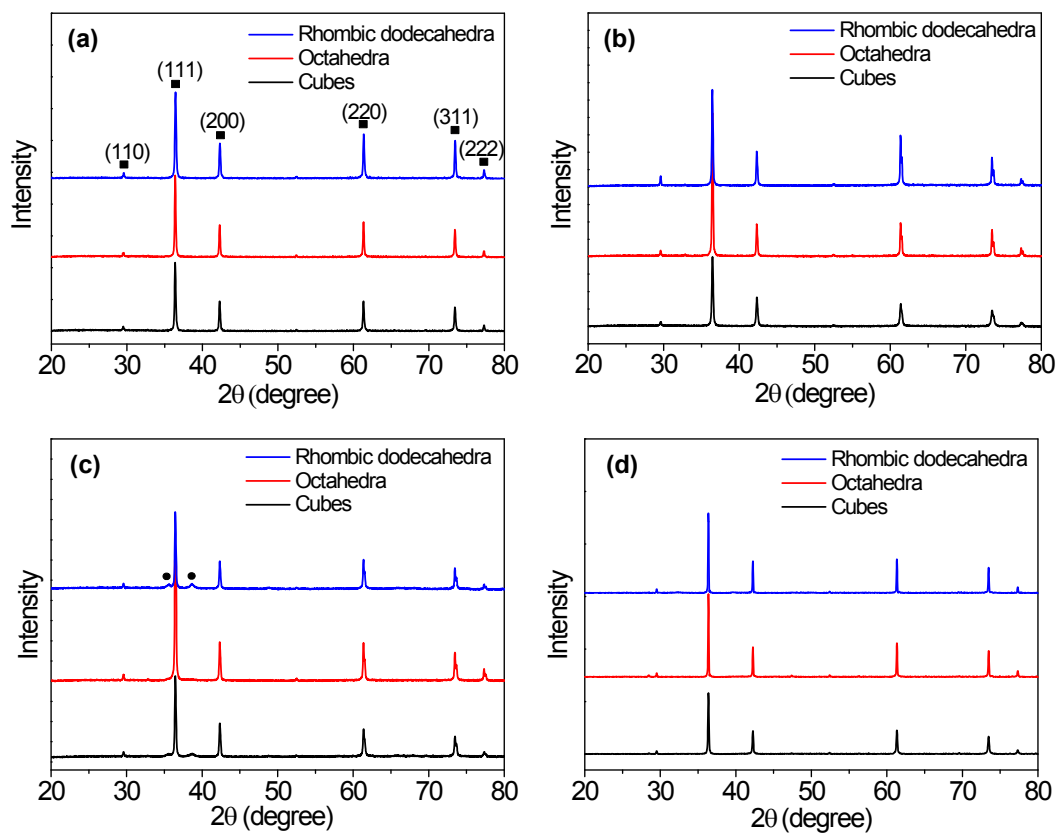

**Figure S2.** XRD patterns of cubic, octahedral, and rhombic dodecahedral  $\text{Cu}_2\text{O}$  crystals; (a) as-made crystals; (b) after 3 weeks in deionized water; (c) after 9 hrs in light irradiation. (d) XRD patterns of  $\text{TiIrO}_x$ -coated  $\text{Cu}_2\text{O}$  for each shape. ■ indicates the peaks of  $\text{Cu}_2\text{O}$  and ● indicates the peaks of  $\text{CuO}$ . The deionized water was used without purging.

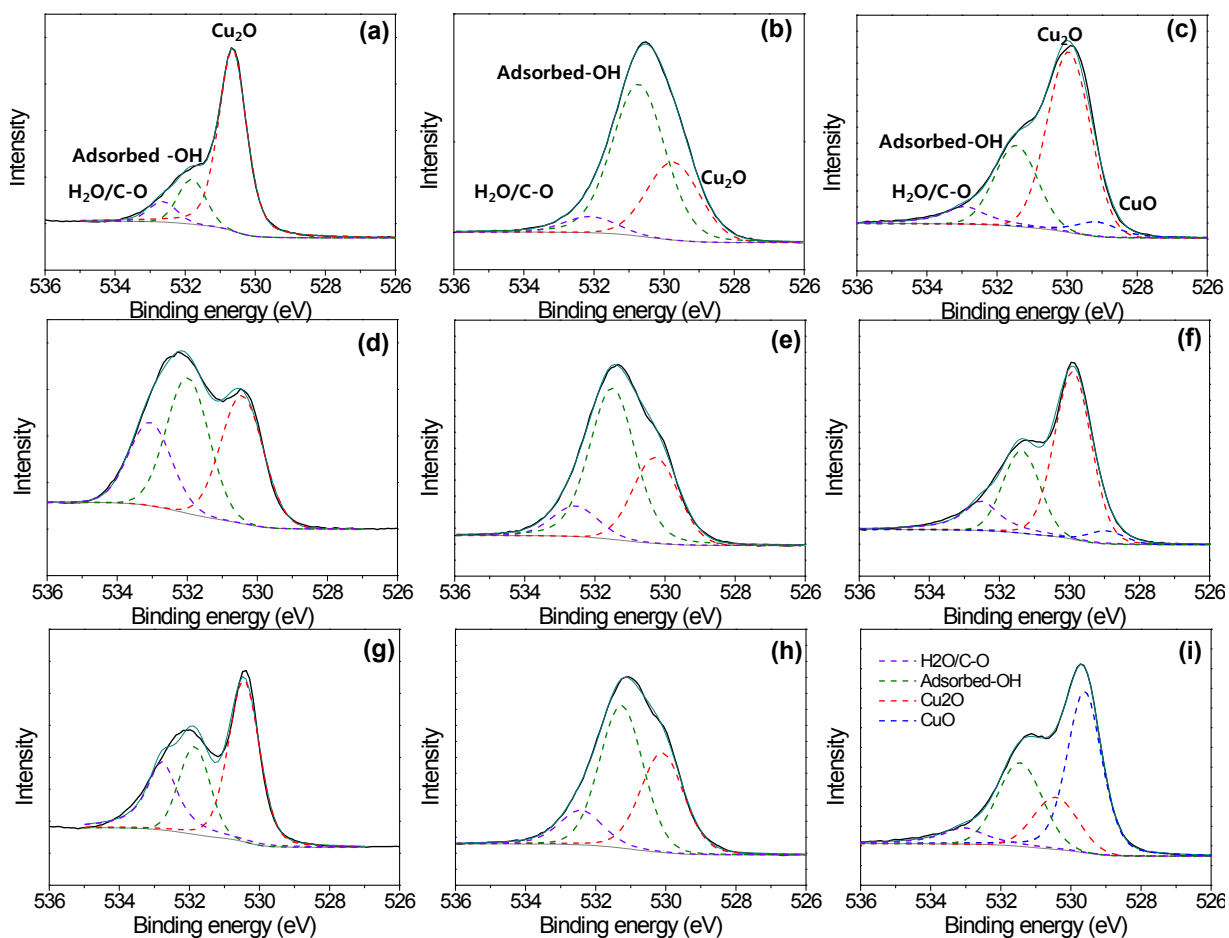

**Figure S3.** XPS O1s peaks of (a)~(c) cubic (d)~(f) octahedral, and (g)~(i) rhombic dodecahedral  $\text{Cu}_2\text{O}$ . (a), (d), (g) as-made  $\text{Cu}_2\text{O}$  crystals; (b), (e), (h) after three weeks in deionized water; (c), (f), (i) after 9 hrs in photo-irradiation.

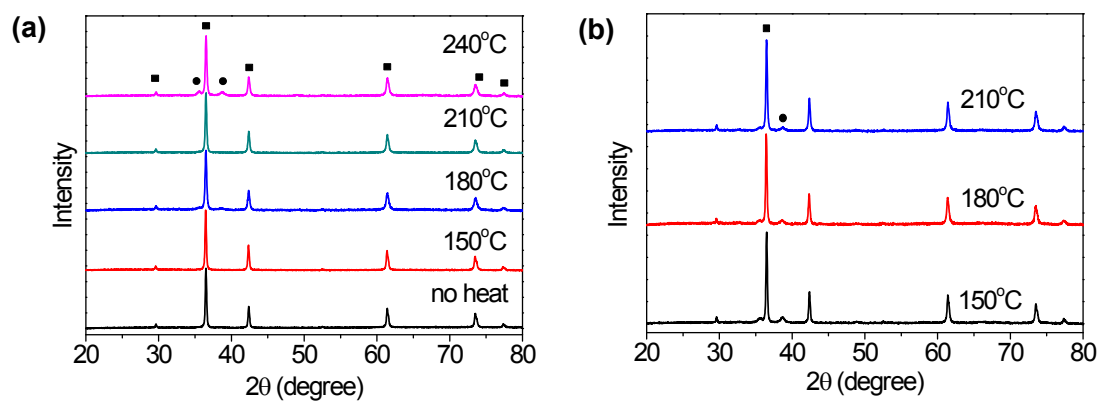

**Figure S4.** XRD patterns of (a)  $\text{TiO}_x$ -coated  $\text{Cu}_2\text{O}$  samples which were treated at different temperatures, and (b) after light irradiation for 9 hrs for  $\text{TiO}_x$ -coated  $\text{Cu}_2\text{O}$  samples treated at different temperatures. The deionized water was used without purging. ■ indicates the peaks of  $\text{Cu}_2\text{O}$  and ● indicates the peaks of  $\text{CuO}$ . The degree of phase deformation upon light irradiation was estimated by comparing the ratio of the peak intensity at  $36.5^\circ$  and  $38.7^\circ$  in (b).

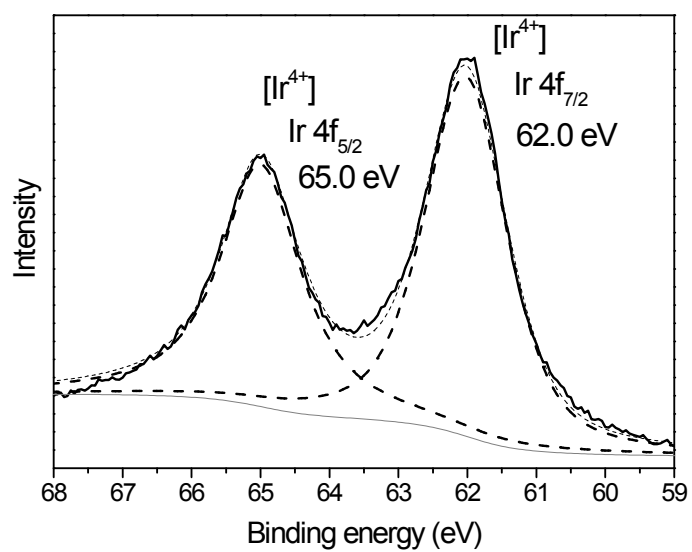

**Figure S5.** XPS Ir 4f peaks for  $\text{TiIrO}_x$  overlayers on rhombic dodecahedral  $\text{Cu}_2\text{O}$  particles

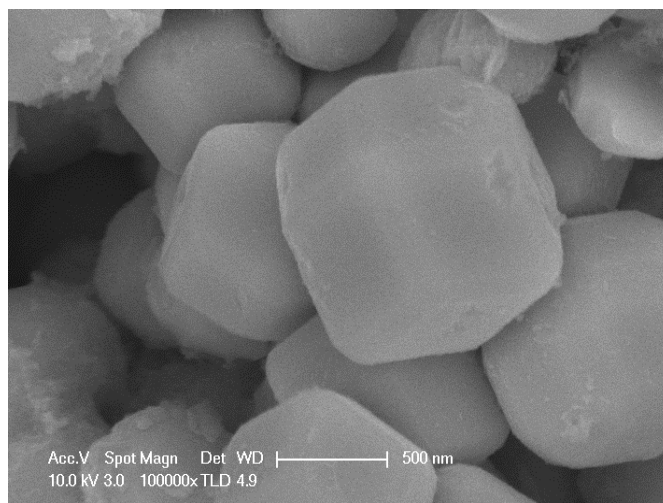

**Figure S6.** SEM image of  $\text{TiIrO}_x$ -coated rhombic dodecahedral  $\text{Cu}_2\text{O}$  particles after the third run of photocatalytic water splitting
